# Supplementary material for: Unveiling the role of carbon oxidation in irreversible degradation of atomically-dispersed FeN4 moieties for proton exchange membrane fuel cells
Source: Royal Society of Chemistry journal article supplement (doi:10.1039/d0ta12105c), 2021-01-01
Supplement: d0ta12105c1.pdf [file d0ta12105c1.pdf]

Supplementary Information for

**Unveiling the Role of Carbon Oxidation in Irreversible Degradation  
of Atomically-Dispersed FeN<sub>4</sub> Moieties for Proton Exchange  
Membrane Fuel Cells**

Xin Tan,\* Hassan A. Tahini, Sean C. Smith\*

*Integrated Materials Design Laboratory, Department of Applied Mathematics, Research School  
of Physics, The Australian National University, Canberra, ACT 2601, Australia*

Email: [Xin.Tan@anu.edu.au](mailto:Xin.Tan@anu.edu.au), [Sean.Smith@anu.edu.au](mailto:Sean.Smith@anu.edu.au)

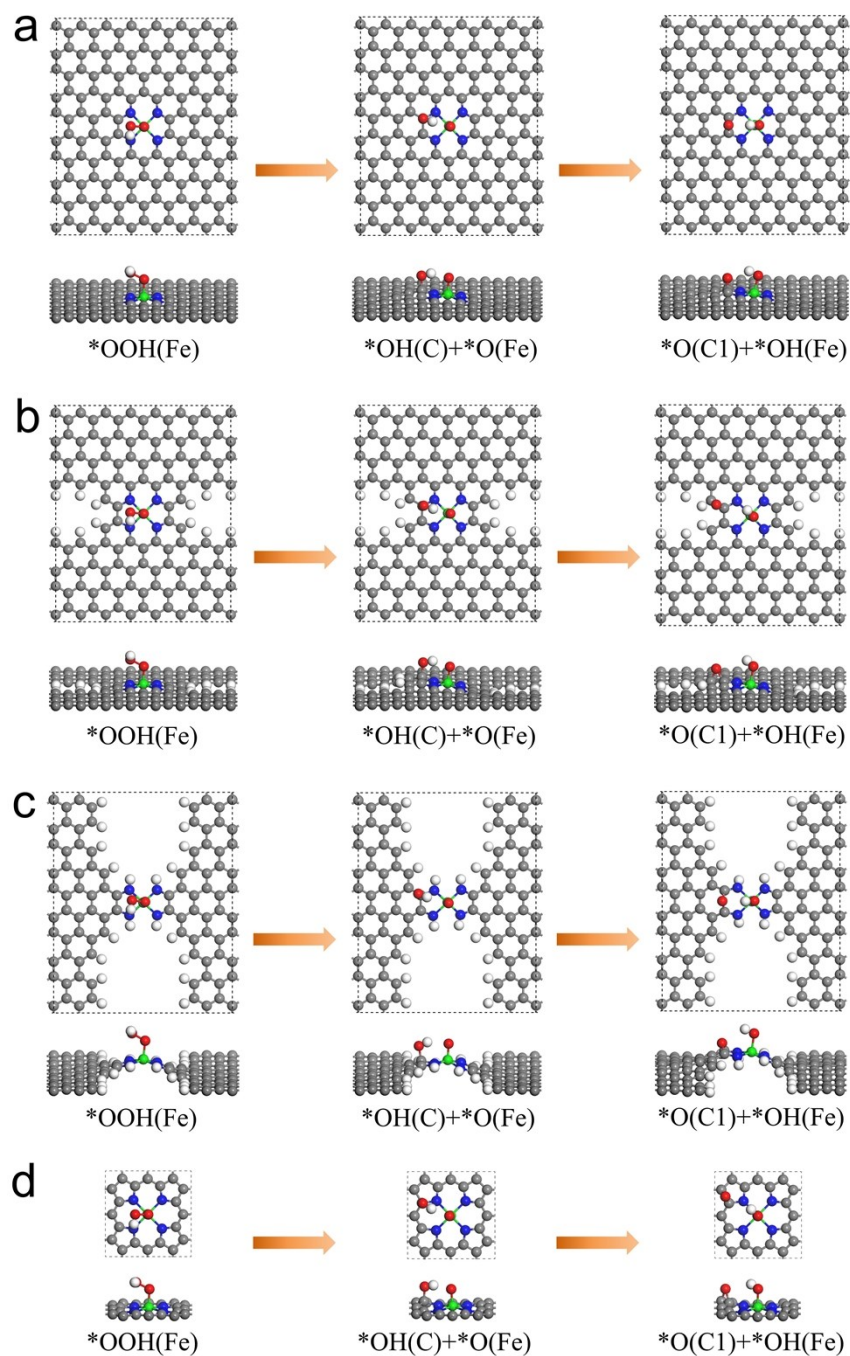

**Figure S1.** Top (upper) and side (lower) views of atomistic structures of the chemical oxidation of carbon next to  $\text{FeN}_4$  moieties through our proposed new carbon oxidation pathway on (a)  $\text{I-FeN}_4\text{C}_{10}$ , (b)  $\text{H-FeN}_4\text{C}_{10}$ , (c)  $\text{H-FeN}_4\text{C}_4$ , and (d)  $\text{I-FeN}_4\text{C}_{12}$ .

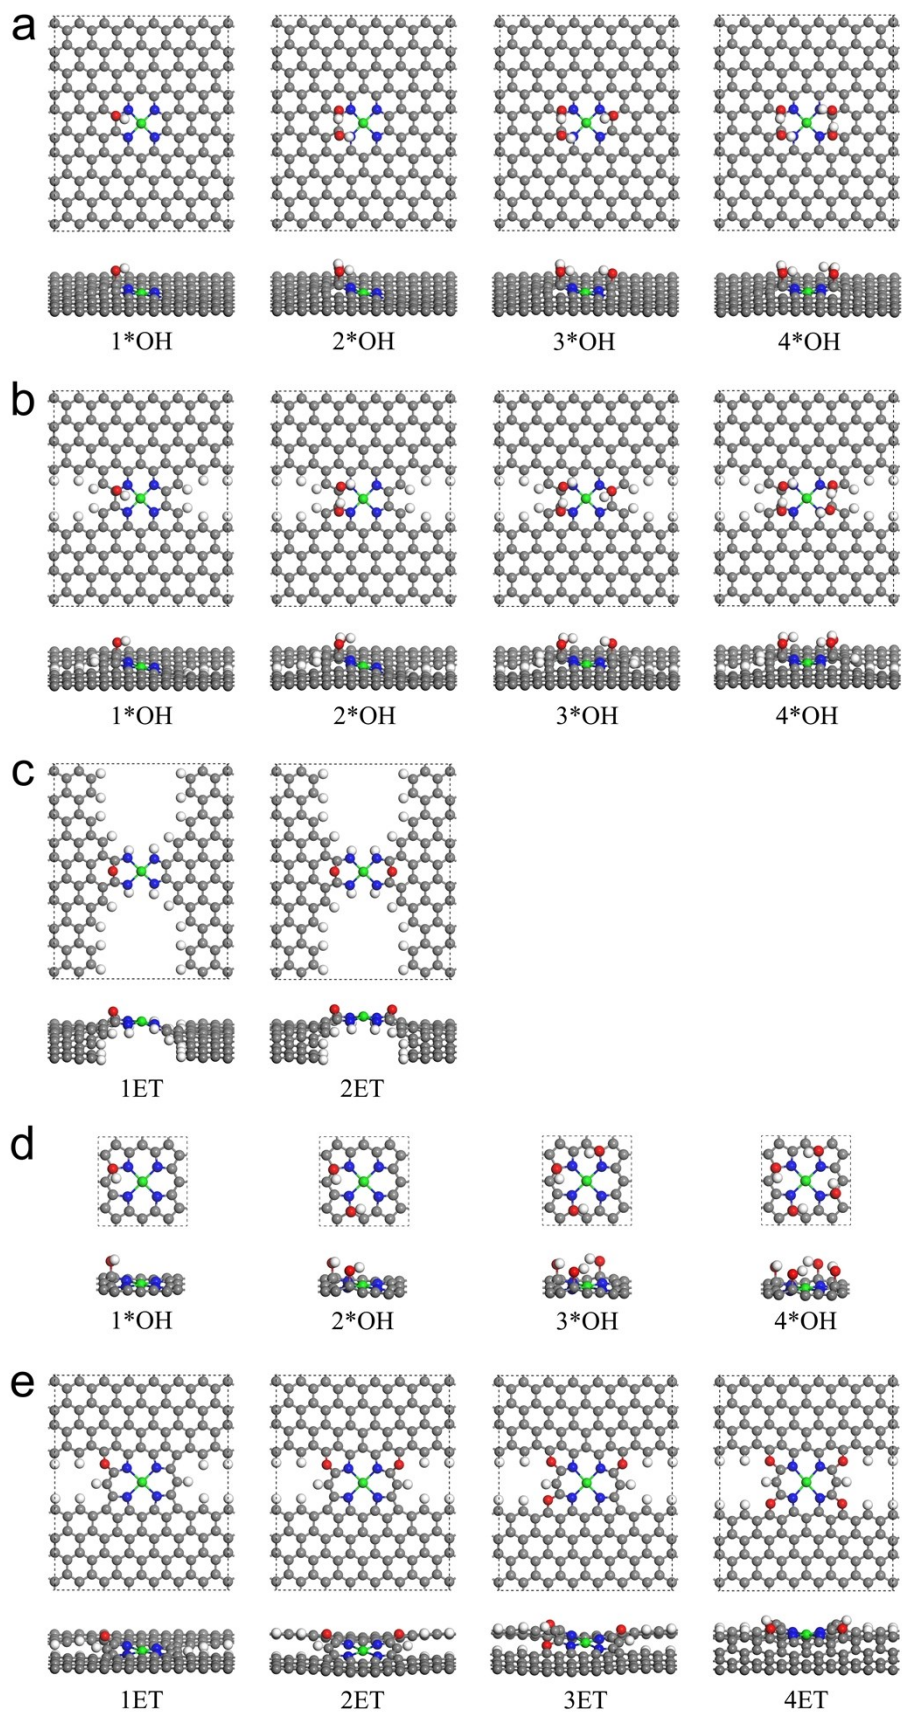

**Figure S2.** Top (upper) and side (lower) views of atomistic structures of (a) I-FeN<sub>4</sub>C<sub>10</sub>, (b) H-FeN<sub>4</sub>C<sub>10</sub>, (c) H-FeN<sub>4</sub>C<sub>4</sub>, (d) I-FeN<sub>4</sub>C<sub>12</sub>, and (e) H-FeN<sub>4</sub>C<sub>12</sub> with different depth (coverage of \*OH/ET functional groups) of carbon oxidation.



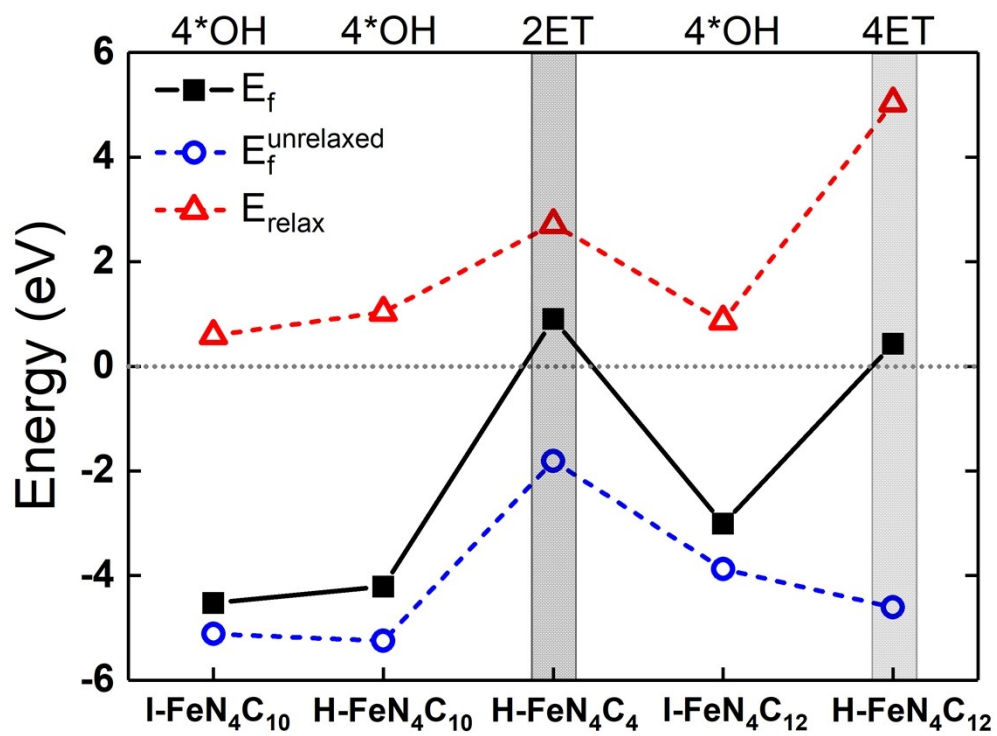

**Figure S4.** Computed  $E_f$ ,  $E_f^{unrelaxed}$ , and  $E_{relax}$  of Fe atoms for different FeN<sub>4</sub> catalysts with full coverage of \*OH/ET functional groups.

## REFERENCES

- (1) Xu, H.; Cheng, D.; Cao, D.; Zeng, X. C. A Universal Principle for a Rational Design of Single-Atom Electrocatalysts. *Nat. Catal.* **2018**, *1*, 339–348.
- (2) Li, X.; Xi, S.; Sun, L.; Dou, S.; Huang, Z.; Su, T.; Wang, X. Isolated FeN<sub>4</sub> Sites for Efficient Electrocatalytic CO<sub>2</sub> Reduction. *Adv. Sci.* **2020**, *7*, 2001545.□□□□
